# Supplementary material for: Escalating pyrethroid resistance in Anopheles funestus increases Plasmodium transmission
Source: Research Square preprint supplement (doi:10.21203/rs.3.rs-8136033/v1), 2025-12-11
Supplement: Supplementary file 1 [file 22cff26dbe75f95eda6473cf.docx]

**Supplementary file**


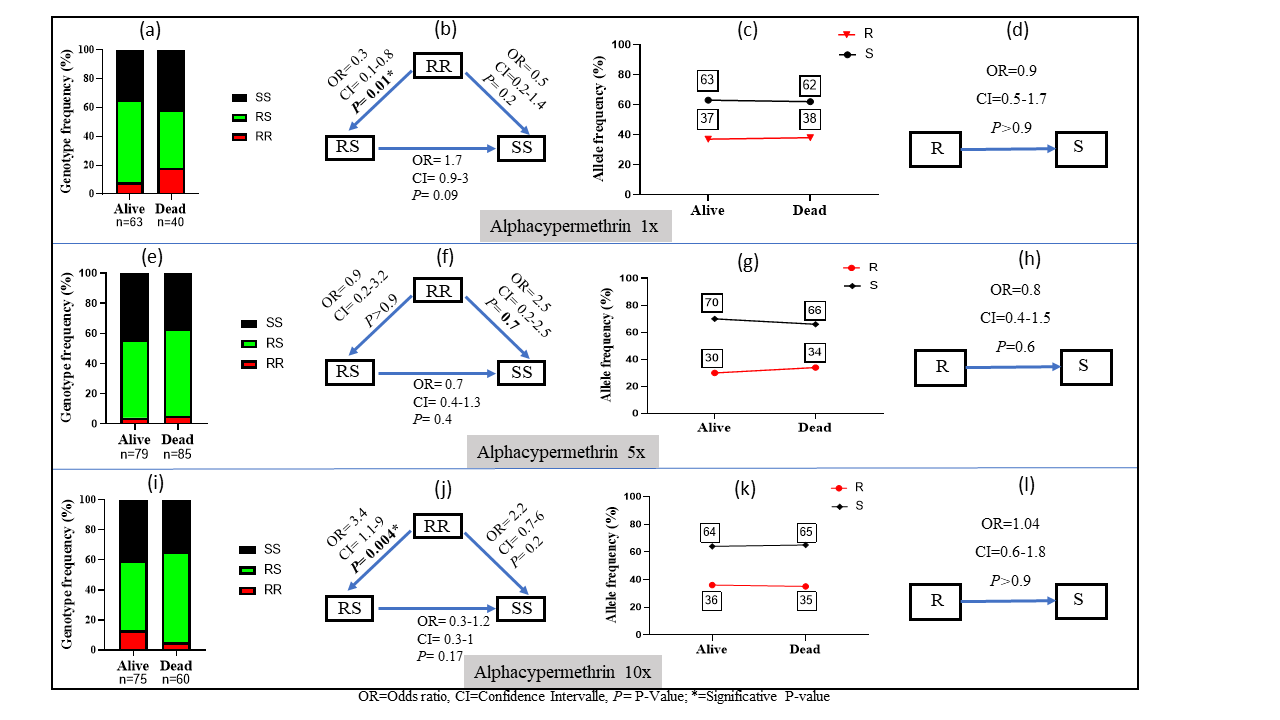


**Figure S1**: Impact of the L119F-*GSTe2* mutation on the resistance status of *Anopheles funestus* s.s. after exposure to type II pyrethroid in Mibellon. **a, b**: Alphacypermethrin 1x at the genotypic level; **c, d**: Alphacypermethrin 1x at the allelic level; **e, f**: Alphacypermethrin 5x at the genotypic level; **g, h**: Alphacypermethrin 5x at the allelic level; **i, j:** Alphacypermethrin 10x at the genotypic level; **k, l**: Alphacypermethrin 10x at the allelic level.


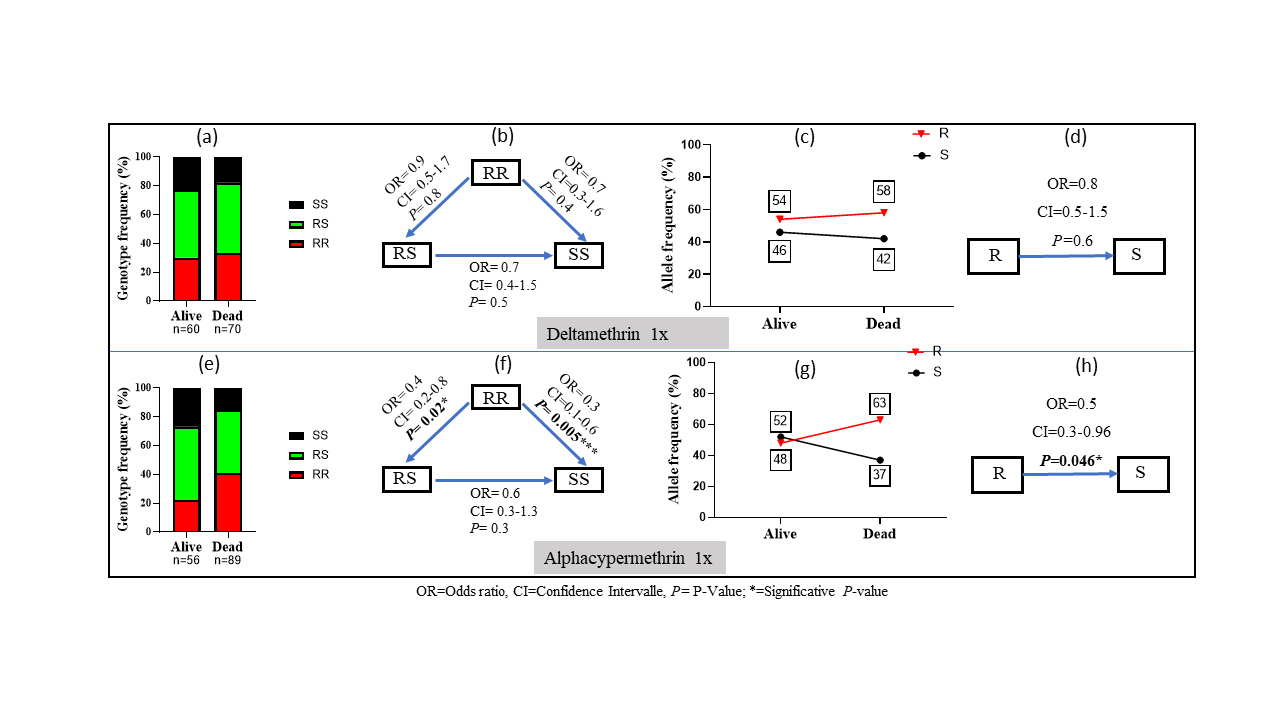


**Figure S2:** Impact of the L119F-*GSTe2* mutation on the resistance status of *Anopheles funestus* s.s. after exposure to type II pyrethroid in Elende. **a, b**: Deltamethrin 1x at the genotypic level; **c, d**: Deltamethrin 1x at the allelic level; e**, f**: Alphacypermethrin 1x at the genotypic level; **g, h**: Alphacypermethrin 1x at the allelic level.
